# Supplementary material for: Biological control of Heterodera glycines by spore-forming plant growth-promoting rhizobacteria (PGPR) on soybean
Source: PLoS One. 2017 Jul 13;12(7):e0181201. doi: 10.1371/journal.pone.0181201 (PMC5509290; doi:10.1371/journal.pone.0181201)
Supplement: S1 Table — In vitro tests were performed in 96-well plates. Data collected were analyzed in SAS 9.4 using PROC GLIMMIX procedure at significant level of α ≤ 0.05. P value less than 0.05 indicate a significant effect. Adjusted P values were obtained according to Dunnett's method. The LS-means are presented in the tables with adjusted P values to determine statistical differences. (XLSX) [file pone.0181201.s001.xlsx]

## Sheet: Sheet1
Table 1. PGPR isolates effect on Heterodera glycinesJ2 mortality as compared to the industry standard biologicals Poncho/Votivo, Clariva, and chemical Temik as well as an untreated controla.
			Heterodera glycines	Dunnett's P vsd (P ≤ 0.05)
	Code	Scientific name	J2 mortality (%)b	Clothianidin	P. nishizawae	Aldicarb	Water
				+ B. firmusc
1	Ad1	Arthrobacter defluvii	7.9	1	1	<.0001	1
2	Ae1	Arthrobacter equi	6.3	1	1	<.0001	1
3	Bal1	Bacillus altitudinis	24	1	1	<.0001	0.9982
4	Bal2	Bacillus altitudinis	5.7	1	1	<.0001	1
5	Bal3	Bacillus altitudinis	33.5	1	0.9985	<.0001	0.1058
6	Bal4	Bacillus altitudinis	5.3	1	1	<.0001	1
7	Bal5	Bacillus altitudinis	2.9	0.9897	1	<.0001	1
8	Bal6	Bacillus altitudinis	14.4	1	1	<.0001	1
9	Bal7	Bacillus altitudinis	8.4	1	1	<.0001	1
10	Bal8	Bacillus altitudinis	11.1	1	1	<.0001	1
11	Bal9	Bacillus altitudinis	51.7	0.1099	0.0206	<.0001	<.0001
12	Bal10	Bacillus altitudinis	24.1	1	1	<.0001	0.8203
13	Bal11	Bacillus altitudinis	64	0.0236	0.0045	0.1725	<.0001
14	Bal12	Bacillus altitudinis	54.7	0.0408	0.0059	0.0002	<.0001
15	Bal13	Bacillus altitudinis	81.2	<.0001	<.0001	1	<.0001
16	Bal14	Bacillus altitudinis	3.8	0.9982	1	<.0001	1
17	Bal15	Bacillus altitudinis	3.4	0.9959	1	<.0001	1
18	Bal16	Bacillus altitudinis	2.8	0.9885	1	<.0001	1
19	Bal17	Bacillus altitudinis	1.3	0.9322	1	<.0001	1
20	Bal18	Bacillus altitudinis	15.7	1	1	<.0001	1
21	Bal19	Bacillus altitudinis	13.4	1	1	<.0001	1
22	Bal20	Bacillus altitudinis	55.1	0.0353	0.005	0.0003	<.0001
23	Bal21	Bacillus altitudinis	41.2	0.915	0.4566	<.0001	0.0059
24	Bar1	Bacillus aryabhattai	0	0.8384	0.9999	<.0001	1
25	Bar2	Bacillus aryabhattai	17.8	1	1	<.0001	1
26	Bar3	Bacillus aryabhattai	24.5	1	1	<.0001	1
27	Bar4	Bacillus aryabhattai	6.4	1	1	<.0001	1
28	Bar5	Bacillus aryabhattai	8.8	1	1	<.0001	1
29	Bar6	Bacillus aryabhattai	5.3	1	1	<.0001	1
30	Bar7	Bacillus aryabhattai	8.8	1	1	<.0001	1
31	Bar8	Bacillus aryabhattai	8.3	1	1	<.0001	1
32	Bar9	Bacillus aryabhattai	38.1	0.9991	0.7674	<.0001	0.0215
33	Bar10	Bacillus aryabhattai	3.3	0.995	1	<.0001	1
34	Bar11	Bacillus aryabhattai	22.2	1	1	<.0001	0.8195
35	Bar12	Bacillus aryabhattai	9.3	1	1	<.0001	1
36	Bar13	Bacillus aryabhattai	19.4	1	1	<.0001	0.9996
37	Bar14	Bacillus aryabhattai	20.3	1	1	<.0001	0.9969
38	Bar15	Bacillus aryabhattai	90.5	<.0001	<.0001	1	<.0001
39	Bar16	Bacillus aryabhattai	64.9	0.018	0.0033	0.2079	<.0001
40	Bar17	Bacillus aryabhattai	14.8	1	1	<.0001	1
41	Bar18	Bacillus aryabhattai	27.5	1	1	<.0001	0.4728
42	Bar19	Bacillus aryabhattai	8.1	1	1	<.0001	1
43	Bar20	Bacillus aryabhattai	27	1	1	<.0001	0.5278
44	Bar21	Bacillus aryabhattai	57.5	0.0136	0.0016	0.0011	<.0001
45	Bar22	Bacillus aryabhattai	28.9	1	1	<.0001	0.3562
46	Bar23	Bacillus aryabhattai	25.9	1	1	<.0001	0.4167
47	Bar24	Bacillus aryabhattai	17.6	1	1	<.0001	1
48	Bar25	Bacillus aryabhattai	34.1	1	0.9943	<.0001	0.0864
49	Bar26	Bacillus aryabhattai	23	1	1	<.0001	0.9065
50	Bar27	Bacillus aryabhattai	49.4	0.209	0.0478	<.0001	<.0001
51	Bar28	Bacillus aryabhattai	46.7	0.395	0.1141	<.0001	0.0004
52	Bar29	Bacillus aryabhattai	4.7	0.9998	1	<.0001	1
53	Bar30	Bacillus aryabhattai	7.3	1	1	<.0001	1
54	Bar31	Bacillus aryabhattai	43.6	0.6961	0.266	<.0001	0.0019
55	Bar32	Bacillus aryabhattai	4.2	0.9994	1	<.0001	1
56	Bar33	Bacillus aryabhattai	2.6	0.9845	1	<.0001	1
57	Bar34	Bacillus aryabhattai	0	0.8384	0.9999	<.0001	1
58	Bar35	Bacillus aryabhattai	15.8	1	1	<.0001	1
59	Bar36	Bacillus aryabhattai	19.3	1	1	<.0001	0.9998
60	Bar37	Bacillus aryabhattai	11.8	1	1	<.0001	1
61	Bar38	Bacillus aryabhattai	5.5	1	1	<.0001	1
62	Bar39	Bacillus aryabhattai	10	1	1	<.0001	1
63	Bar40	Bacillus aryabhattai	1.5	0.9446	1	<.0001	1
64	Bar41	Bacillus aryabhattai	5.3	1	1	<.0001	1
65	Bar42	Bacillus aryabhattai	7.5	1	1	<.0001	1
66	Bar43	Bacillus aryabhattai	2.1	0.9705	1	<.0001	1
67	Bar44	Bacillus aryabhattai	1.1	0.9246	1	<.0001	1
68	Bar45	Bacillus aryabhattai	10.3	1	1	<.0001	1
69	Bar46	Bacillus aryabhattai	33.1	1	1	<.0001	0.4749
70	Bar47	Bacillus aryabhattai	0.7	0.8939	1	<.0001	1
71	Bar48	Bacillus aryabhattai	21.7	1	1	<.0001	0.9746
72	Bar49	Bacillus aryabhattai	10.8	1	1	<.0001	1
73	Bar50	Bacillus aryabhattai	2.7	0.9871	1	<.0001	1
74	Bar51	Bacillus aryabhattai	47	0.8294	0.4394	0.0007	0.0155
75	Bar52	Bacillus aryabhattai	9.5	1	1	<.0001	1
76	Bar53	Bacillus aryabhattai	27.1	1	1	<.0001	0.5132
77	Bce1	Bacillus cereus	4.8	1	1	<.0001	1
78	Bce2	Bacillus cereus	7.5	1	1	<.0001	1
79	Bce3	Bacillus cereus	3.1	0.9926	1	<.0001	1
80	Bce4	Bacillus cereus	1.2	0.9307	1	<.0001	1
81	Bce5	Bacillus cereus	22.8	1	1	<.0001	0.9231
82	Bce6	Bacillus cereus	5.1	1	1	<.0001	1
83	Bce7	Bacillus cereus	23.1	1	1	<.0001	0.8994
84	Bce8	Bacillus cereus	16.2	1	1	<.0001	1
85	Bce9	Bacillus cereus	4.7	0.9998	1	<.0001	1
86	Bce10	Bacillus cereus	15.3	1	1	<.0001	1
87	Bce11	Bacillus cereus	15.1	1	1	<.0001	1
88	Bce12	Bacillus cereus	32.7	1	0.9998	<.0001	0.1333
89	Bce13	Bacillus cereus	15.7	1	1	<.0001	1
90	Bce14	Bacillus cereus	1.5	0.9459	1	<.0001	1
91	Bce15	Bacillus cereus	0	0.8384	0.9999	<.0001	1
92	Bce16	Bacillus cereus	0	0.8384	0.9999	<.0001	1
93	Bce17	Bacillus cereus	0	0.8384	0.9999	<.0001	1
94	Bce18	Bacillus cereus	1.7	0.9544	1	<.0001	1
95	Bce19	Bacillus cereus	2.2	0.9738	1	<.0001	1
96	Bce20	Bacillus cereus	23.9	1	1	<.0001	0.8384
97	Bce21	Bacillus cereus	10.4	1	1	<.0001	1
98	Bce22	Bacillus cereus	5.1	1	1	<.0001	1
99	Bce23	Bacillus cereus	13.1	1	1	<.0001	1
100	Bce24	Bacillus cereus	9.4	1	1	<.0001	1
101	Bce25	Bacillus cereus	3.7	0.9979	1	<.0001	1
102	Bce26	Bacillus cereus	3.9	0.9985	1	<.0001	1
103	Bce27	Bacillus cereus	0.7	0.8957	1	<.0001	1
104	Bce28	Bacillus cereus	6.1	1	1	<.0001	1
105	Bce29	Bacillus cereus	2.9	0.9897	1	<.0001	1
106	Bce30	Bacillus cereus	1.4	0.9393	1	<.0001	1
107	Bce31	Bacillus cereus	0.6	0.8882	1	<.0001	1
108	Bce32	Bacillus cereus	22.5	1	1	<.0001	0.9393
109	Bce33	Bacillus cereus	12.2	1	1	<.0001	1
110	Bce34	Bacillus cereus	5.5	1	1	<.0001	1
111	Bce35	Bacillus cereus	12.7	1	1	<.0001	1
112	Bce36	Bacillus cereus	9.6	1	1	<.0001	1
113	Bce37	Bacillus cereus	0.4	0.8725	1	<.0001	1
114	Bce38	Bacillus cereus	10.4	1	1	<.0001	1
115	Bce39	Bacillus cereus	2.3	0.9762	1	<.0001	1
116	Bce40	Bacillus cereus	4.5	0.9997	1	<.0001	1
117	Bce41	Bacillus cereus	38.4	0.9981	0.7347	<.0001	0.0189
118	Bce42	Bacillus cereus	48.3	0.2775	0.0701	<.0001	0.0002
119	Bce43	Bacillus cereus	22.5	1	1	<.0001	0.9406
120	Bce44	Bacillus cereus	13.9	1	1	<.0001	1
121	Bce45	Bacillus cereus	37.6	0.9998	0.8133	<.0001	0.0258
122	Bce46	Bacillus cereus	26.1	1	1	<.0001	0.6134
123	Bce47	Bacillus cereus	24.4	1	1	<.0001	0.7919
124	Bce48	Bacillus cereus	0.6	0.8882	1	<.0001	1
125	Bce49	Bacillus cereus	6.9	1	1	<.0001	1
126	Bce50	Bacillus cereus	8.2	1	1	<.0001	1
127	Bce51	Bacillus cereus	10.6	1	1	<.0001	1
128	Bfi1	Bacillus firmus	12.7	1	1	<.0001	1
129	Bga1	Bacillus galliciensis	7.8	1	1	<.0001	1
130	Ble1	Bacillus lentus	74.2	<.0001	<.0001	0.4208	<.0001
131	Bmo1	Bacillus mojavensis	0.6	0.8863	1	<.0001	1
132	Bmo2	Bacillus mojavensis	6.5	1	1	<.0001	1
133	Bmo3	Bacillus mojavensis	54.5	0.272	0.0907	0.0117	0.001
134	Bmo4	Bacillus mojavensis	1	0.9183	1	<.0001	1
135	Bmt1	Bacillus methylotrophicus	1.6	0.9497	1	<.0001	1
136	Bmt2	Bacillus methylotrophicus	37.3	0.9999	0.8384	<.0001	0.0286
137	Bmt3	Bacillus methylotrophicus	3.3	0.9955	1	<.0001	1
138	Bmt4	Bacillus methylotrophicus	1.3	0.9322	1	<.0001	1
139	Bmt5	Bacillus methylotrophicus	0	0.8384	0.9999	<.0001	1
140	Bmt6	Bacillus methylotrophicus	9.8	1	1	<.0001	1
141	Bmt7	Bacillus methylotrophicus	38.3	0.9986	0.7499	<.0001	0.0201
142	Bmt8	Bacillus methylotrophicus	1.2	0.9292	1	<.0001	1
143	Bmt9	Bacillus methylotrophicus	2.7	0.9866	1	<.0001	1
144	Bmt10	Bacillus methylotrophicus	51.4	0.4749	0.1896	0.0039	0.0033
145	Bmt11	Bacillus methylotrophicus	12.5	1	1	<.0001	1
146	Bmt12	Bacillus methylotrophicus	11.8	1	1	<.0001	1
147	Bmt13	Bacillus methylotrophicus	9	1	1	<.0001	1
148	Bmy1	Bacillus mycoides	35.2	1	0.973	<.0001	0.0613
149	Bmy2	Bacillus mycoides	5.1	1	1	<.0001	1
150	Bmy3	Bacillus mycoides	7.8	1	1	<.0001	1
151	Bmy4	Bacillus mycoides	0	0.8384	0.9999	<.0001	1
152	Bmy5	Bacillus mycoides	2	0.9669	1	<.0001	1
153	Bmy6	Bacillus mycoides	1.8	0.9589	1	<.0001	1
154	Bmy7	Bacillus mycoides	47.9	0.7589	0.3763	0.001	0.0115
155	Bmy8	Bacillus mycoides	18.7	1	1	<.0001	1
156	Bmy9	Bacillus mycoides	19.8	1	1	<.0001	1
157	Bmy10	Bacillus mycoides	23.1	1	1	<.0001	0.8994
158	Bmy11	Bacillus mycoides	9.7	1	1	<.0001	1
159	Bmy12	Bacillus mycoides	10.4	1	1	<.0001	1
160	Bmy13	Bacillus mycoides	19.4	1	1	<.0001	0.9997
161	Bmy14	Bacillus mycoides	34.2	1	0.994	<.0001	0.0857
162	Bmy15	Bacillus mycoides	31.3	1	1	<.0001	0.6203
163	Bmy16	Bacillus mycoides	5.2	1	1	<.0001	1
164	Bmy17	Bacillus mycoides	6.5	1	1	<.0001	1
165	Bmy18	Bacillus mycoides	5.4	1	1	<.0001	1
166	Bmy19	Bacillus mycoides	66.9	0.0092	0.0015	0.3115	<.0001
167	Bmy20	Bacillus mycoides	10.3	1	1	<.0001	1
168	Bmy21	Bacillus mycoides	32.4	1	0.9999	<.0001	0.1464
169	Bmy22	Bacillus mycoides	21	1	1	<.0001	1
170	Bmy23	Bacillus mycoides	28	1	1	0.0002	1
171	Bmy24	Bacillus mycoides	5.8	1	1	<.0001	1
172	Bmy25	Bacillus mycoides	14.2	1	1	<.0001	1
173	Bmy26	Bacillus mycoides	38.7	0.9963	0.7013	<.0001	0.0166
174	Bmy27	Bacillus mycoides	1.1	0.9246	1	<.0001	1
175	Bmy28	Bacillus mycoides	1	0.9166	1	<.0001	1
176	Bmy29	Bacillus mycoides	0.6	0.8863	1	<.0001	1
177	Bmy30	Bacillus mycoides	14.9	1	1	<.0001	1
178	Bmy31	Bacillus mycoides	5.3	1	1	<.0001	1
179	Bmy32	Bacillus mycoides	77.7	0.0001	<.0001	0.9947	<.0001
180	Bmy33	Bacillus mycoides	0	0.8384	0.9999	<.0001	1
181	Bmy34	Bacillus mycoides	0	0.8384	0.9999	<.0001	1
182	Bmy35	Bacillus mycoides	1.2	0.9277	1	<.0001	1
183	Bmy36	Bacillus mycoides	0	0.8384	0.9999	<.0001	1
184	Bmy37	Bacillus mycoides	16.4	1	1	<.0001	1
185	Bmy38	Bacillus mycoides	13.9	1	1	<.0001	1
186	Bmy39	Bacillus mycoides	26.5	1	1	<.0001	0.5751
187	Bmy40	Bacillus mycoides	1	0.9166	1	<.0001	1
188	Bmy41	Bacillus mycoides	1.9	0.965	1	<.0001	1
189	Bmy42	Bacillus mycoides	46.2	1	0.9717	0.0389	0.2572
190	Bmy43	Bacillus mycoides	1.8	0.9599	1	<.0001	1
191	Bmy44	Bacillus mycoides	5.8	1	1	<.0001	1
192	Bps1	Bacillus psychrosaccharolyticus	12.6	1	1	<.0001	1
193	Bps2	Bacillus psychrosaccharolyticus	21.6	1	1	<.0001	1
194	Bps3	Bacillus psychrosaccharolyticus	9.7	1	1	<.0001	1
195	Bps4	Bacillus psychrosaccharolyticus	0	0.8384	0.9999	<.0001	1
196	Bps5	Bacillus psychrosaccharolyticus	2.9	0.9905	1	<.0001	1
197	Bpu1	Bacillus pumilus	0	0.8384	0.9999	<.0001	1
198	Bpu2	Bacillus pumilus	7	1	1	<.0001	1
199	Bpu3	Bacillus pumilus	19.1	1	1	<.0001	0.9999
200	Bpu4	Bacillus pumilus	17.7	1	1	<.0001	1
201	Bpu5	Bacillus pumilus	0	0.8384	0.9999	<.0001	1
202	Bpu6	Bacillus pumilus	78.4	<.0001	<.0001	0.9982	<.0001
203	Brio1	Brevibacterium iodinum	2.6	0.9856	1	<.0001	1
204	Bsa1	Bacillus safensis	0	0.8384	0.9999	<.0001	1
205	Bsa2	Bacillus safensis	3.6	0.9974	1	<.0001	1
206	Bsa3	Bacillus safensis	1.6	0.9521	1	<.0001	1
207	Bsa4	Bacillus safensis	2	0.9688	1	<.0001	1
208	Bsa5	Bacillus safensis	0.6	0.8882	1	<.0001	1
209	Bsa6	Bacillus safensis	4.7	0.9998	1	<.0001	1
210	Bsa7	Bacillus safensis	0.5	0.8805	1	<.0001	1
211	Bsa8	Bacillus safensis	2.2	0.9746	1	<.0001	1
212	Bsa9	Bacillus safensis	1.1	0.9199	1	<.0001	1
213	Bsa10	Bacillus safensis	13.1	1	1	<.0001	1
214	Bsa11	Bacillus safensis	46.1	0.4453	0.1353	<.0001	0.0005
215	Bsa12	Bacillus safensis	6.4	1	1	<.0001	1
216	Bsa13	Bacillus safensis	14.3	1	1	<.0001	1
217	Bsa14	Bacillus safensis	21.5	1	1	<.0001	0.979
218	Bsa15	Bacillus safensis	0.6	0.8882	1	<.0001	1
219	Bsa16	Bacillus safensis	33.1	1	0.9994	<.0001	0.1194
220	Bsa17	Bacillus safensis	5.6	1	1	<.0001	1
221	Bsa18	Bacillus safensis	0.6	0.8844	1	<.0001	1
222	Bsa19	Bacillus safensis	0	0.8384	0.9999	<.0001	1
223	Bsa20	Bacillus safensis	1.1	0.9231	1	<.0001	1
224	Bsa21	Bacillus safensis	0	0.8384	0.9999	<.0001	1
225	Bsa22	Bacillus safensis	5.6	1	1	<.0001	1
226	Bsa23	Bacillus safensis	18.2	1	1	<.0001	1
227	Bsa24	Bacillus safensis	1.5	0.9446	1	<.0001	1
228	Bsa25	Bacillus safensis	62.5	0.0378	0.0079	0.12	<.0001
229	Bsa26	Bacillus safensis	74.1	0.0006	<.0001	0.8614	<.0001
230	Bsa27	Bacillus safensis	79.2	<.0001	<.0001	0.9997	<.0001
231	Bsa28	Bacillus safensis	9.7	1	1	<.0001	1
232	Bsa29	Bacillus safensis	0	0.8384	0.9999	<.0001	1
233	Bsa30	Bacillus safensis	2.2	0.9738	1	<.0001	1
234	Bsa31	Bacillus safensis	25.4	1	1	<.0001	0.6884
235	Bsa32	Bacillus safensis	9.3	1	1	<.0001	1
236	Bsa33	Bacillus safensis	39.4	0.9889	0.6366	<.0001	0.0129
237	Bsa34	Bacillus safensis	3.4	0.9963	1	<.0001	1
238	Bsa35	Bacillus safensis	2.1	0.9697	1	<.0001	1
239	Bsi1	Bacillus siamensis	8.9	1	1	<.0001	0.9955
240	Bsi2	Bacillus siamensis	0	0.8384	0.9999	<.0001	1
241	Bsi3	Bacillus siamensis	2.8	0.9885	1	<.0001	1
242	Bsp1	Bacillus simplex	0.8	0.9047	1	<.0001	1
243	Bsp2	Bacillus simplex	60.2	0.0044	0.0004	0.0038	<.0001
244	Bsp3	Bacillus simplex	62	0.0437	0.0095	0.1061	<.0001
245	Bsp4	Bacillus simplex	93.9	<.0001	<.0001	1	<.0001
246	Bsp5	Bacillus simplex	22.1	1	1	<.0001	0.9589
247	Bsp6	Bacillus simplex	40.1	0.9688	0.5575	<.0001	0.0093
248	Bsp7	Bacillus simplex	29.3	1	1	<.0001	0.3273
249	Bsp8	Bacillus simplex	55.9	0.2035	0.0626	0.0186	0.0005
250	Bsp9	Bacillus simplex	12.8	1	1	<.0001	1
251	Bsp10	Bacillus simplex	15.7	1	1	<.0001	1
252	Bsp11	Bacillus simplex	8.6	1	1	<.0001	1
253	Bsp12	Bacillus simplex	21.6	1	1	<.0001	0.9762
254	Bsp13	Bacillus simplex	35.2	1	0.9722	<.0001	0.0608
255	Bsp14	Bacillus simplex	20.9	1	1	<.0001	0.992
256	Bsp15	Bacillus simplex	29.6	1	1	<.0001	0.3035
257	Bsp16	Bacillus simplex	9.8	1	1	<.0001	1
258	Bsp17	Bacillus simplex	2.2	0.9746	1	<.0001	1
259	Bsp18	Bacillus simplex	1.7	0.9533	1	<.0001	1
260	Bsp19	Bacillus simplex	0	0.8384	0.9999	<.0001	1
261	Bsp20	Bacillus simplex	22.7	1	1	<.0001	0.9262
262	Bsp21	Bacillus simplex	17.8	1	1	<.0001	1
263	Bsp22	Bacillus simplex	0.9	0.9099	1	<.0001	1
264	Bsp23	Bacillus simplex	11.1	1	1	<.0001	1
265	Bsp24	Bacillus simplex	44.8	0.5776	0.1983	<.0001	0.0011
266	Bsp25	Bacillus simplex	3.2	0.9938	1	<.0001	1
267	Bsp26	Bacillus simplex	64.5	0.0201	0.0038	0.1927	<.0001
268	Bsp27	Bacillus simplex	2.9	0.9897	1	<.0001	1
269	Bsp28	Bacillus simplex	0	0.8384	0.9999	<.0001	1
270	Bsp29	Bacillus simplex	3.9	0.9985	1	<.0001	1
271	Bsp30	Bacillus simplex	5.4	1	1	<.0001	1
272	Bsp31	Bacillus simplex	3.9	0.9985	1	<.0001	1
273	Bsp32	Bacillus simplex	14.4	1	1	<.0001	1
274	Bsp33	Bacillus simplex	12	1	1	<.0001	1
275	Bsp34	Bacillus simplex	5.9	1	1	<.0001	1
276	Bsp35	Bacillus simplex	31.4	1	1	<.0001	0.1918
277	Bsp36	Bacillus simplex	11.4	1	1	<.0001	1
278	Bsp37	Bacillus simplex	12.2	1	1	<.0001	1
279	Bsp38	Bacillus simplex	5.2	1	1	<.0001	1
280	Bsp39	Bacillus simplex	3.3	0.9955	1	<.0001	1
281	Bsp40	Bacillus simplex	4.7	0.9999	1	<.0001	1
282	Bsp41	Bacillus simplex	2	0.9679	1	<.0001	1
283	Bsp42	Bacillus simplex	21.1	1	1	<.0001	0.9885
284	Bsp43	Bacillus simplex	0	0.8384	0.9999	<.0001	1
285	Bsp44	Bacillus simplex	7.3	1	1	<.0001	1
286	Bsp45	Bacillus simplex	4.3	0.9995	1	<.0001	1
287	Bsp46	Bacillus simplex	34.4	1	0.9916	<.0001	0.0804
288	Bsp47	Bacillus simplex	15.8	1	1	<.0001	1
289	Bsp48	Bacillus simplex	3.6	0.9648	1	<.0001	1
290	Bsp49	Bacillus simplex	5.8	1	1	<.0001	1
291	Bsp50	Bacillus simplex	8.2	1	1	<.0001	1
292	Bsp51	Bacillus simplex	10	1	1	<.0001	1
293	Bsp52	Bacillus simplex	1.8	0.9578	1	<.0001	1
294	Bsp53	Bacillus simplex	81.9	<.0001	<.0001	1	<.0001
295	Bsp54	Bacillus simplex	3	0.9923	1	<.0001	1
296	Bsp55	Bacillus simplex	2.9	0.9909	1	<.0001	1
297	Bsp56	Bacillus simplex	6.2	1	1	<.0001	1
298	Bsp57	Bacillus simplex	28.1	1	1	<.0001	0.4186
299	Bsp58	Bacillus simplex	6.4	1	1	<.0001	1
300	Bsp59	Bacillus simplex	10.9	1	1	<.0001	1
301	Bsp60	Bacillus simplex	7.1	1	1	<.0001	1
302	Bsp61	Bacillus simplex	8.5	1	1	<.0001	1
303	Bsp62	Bacillus simplex	7.3	1	1	<.0001	1
304	Bsp63	Bacillus simplex	4.6	0.9998	1	<.0001	1
305	Bsp64	Bacillus simplex	16.5	1	1	<.0001	1
306	Bsp65	Bacillus simplex	8.3	1	1	<.0001	1
307	Bsp66	Bacillus simplex	25.8	1	1	<.0001	0.6495
308	Bsp67	Bacillus simplex	0	0.8384	0.9999	<.0001	1
309	Bsp68	Bacillus simplex	87.1	<.0001	<.0001	1	<.0001
310	Bsp69	Bacillus simplex	24.3	1	1	<.0001	0.7967
311	Bsp70	Bacillus simplex	19.8	1	1	<.0001	0.9992
312	Bsp71	Bacillus simplex	31.7	1	1	<.0001	0.1792
313	Bsp72	Bacillus simplex	23.3	1	1	<.0001	0.8863
314	Bsp73	Bacillus simplex	17.1	1	1	<.0001	1
315	Bsp74	Bacillus simplex	10.5	1	1	<.0001	1
316	Bsp75	Bacillus simplex	5.6	1	1	<.0001	1
317	Bsp76	Bacillus simplex	14.5	1	1	<.0001	1
318	Bsp77	Bacillus simplex	23.1	1	1	<.0001	0.8975
319	Bsp78	Bacillus simplex	0.8	0.9047	1	<.0001	1
320	Bsp79	Bacillus simplex	49.4	0.2104	0.0483	<.0001	<.0001
321	Bsp80	Bacillus simplex	12	1	1	<.0001	1
322	Bsp81	Bacillus simplex	9.6	1	1	<.0001	1
323	Bsp82	Bacillus simplex	4.3	0.9995	1	<.0001	1
324	Bsp83	Bacillus simplex	2.7	0.9871	1	<.0001	1
325	Bsp84	Bacillus simplex	39	1	0.9826	<.0001	0.147
326	Bsp85	Bacillus simplex	0.9	0.9065	1	<.0001	1
327	Bsp86	Bacillus simplex	0	0.8384	0.9999	<.0001	1
328	Bsp87	Bacillus simplex	4.9	1	1	<.0001	1
329	Bsp88	Bacillus simplex	22	1	1	<.0001	0.963
330	Bsp89	Bacillus simplex	38.1	0.9991	0.7674	<.0001	0.0215
331	Bsp90	Bacillus simplex	52.2	0.034	0.0038	<.0001	<.0001
332	Bsp91	Bacillus simplex	10.6	1	1	<.0001	1
333	Bsp92	Bacillus simplex	7.9	1	1	<.0001	1
334	Bsp93	Bacillus simplex	26.4	1	1	<.0001	0.5802
335	Bsp94	Bacillus simplex	44.1	0.6469	0.2363	<.0001	0.0015
336	Bsp95	Bacillus simplex	0.4	0.8725	1	<.0001	1
337	Bsp96	Bacillus simplex	1.3	0.9365	1	<.0001	1
338	Bsp97	Bacillus simplex	1.7	0.9544	1	<.0001	1
339	Bsp98	Bacillus simplex	0.5	0.8785	1	<.0001	1
340	Bsp99	Bacillus simplex	1.5	0.9472	1	<.0001	1
341	Bsp100	Bacillus simplex	7.9	1	1	<.0001	1
342	Bsp101	Bacillus simplex	49.9	0.591	0.2574	0.0022	0.0057
343	Bsp102	Bacillus simplex	2.1	0.9714	1	<.0001	1
344	Bsp103	Bacillus simplex	49.3	0.2146	0.0495	<.0001	<.0001
345	Bsp104	Bacillus simplex	4.3	0.9995	1	<.0001	1
346	Bsp105	Bacillus simplex	12	1	1	<.0001	1
347	Bsp106	Bacillus simplex	0	0.8384	0.9999	<.0001	1
348	Bsp107	Bacillus simplex	0	0.8384	0.9999	<.0001	1
349	Bsp108	Bacillus simplex	4.3	0.9995	1	<.0001	1
350	Bsp109	Bacillus simplex	3.1	0.9935	1	<.0001	1
351	Bsp110	Bacillus simplex	4.6	0.9998	1	<.0001	1
352	Bsp111	Bacillus simplex	2.8	0.9885	1	<.0001	1
353	Bsp112	Bacillus simplex	8	1	1	<.0001	1
354	Bsp113	Bacillus simplex	63.3	0.001	<.0001	0.0144	<.0001
355	Bsp114	Bacillus simplex	26.8	1	1	<.0001	0.9455
356	Bsp115	Bacillus simplex	48.2	0.7383	0.3598	0.0011	0.0106
357	Bsp116	Bacillus simplex	9.8	1	1	<.0001	1
358	Bsp117	Bacillus simplex	16.1	1	1	<.0001	1
359	Bsp118	Bacillus simplex	25.8	1	1	<.0001	0.6469
360	Bsp119	Bacillus simplex	38	0.9993	0.7773	<.0001	0.0223
361	Bsp120	Bacillus simplex	5.4	1	1	<.0001	1
362	Bsp121	Bacillus simplex	18.7	1	1	<.0001	1
363	Bsp122	Bacillus simplex	2.7	0.9871	1	<.0001	1
364	Bsp123	Bacillus simplex	74.2	0.0005	<.0001	0.8715	<.0001
365	Bsp124	Bacillus simplex	14.3	1	1	<.0001	1
366	Bsp125	Bacillus simplex	6.7	1	1	<.0001	1
367	Bsp126	Bacillus simplex	3.6	0.9972	1	<.0001	1
368	Bsp127	Bacillus simplex	0.8	0.8994	1	<.0001	1
369	Bsp128	Bacillus simplex	18.3	1	1	<.0001	1
370	Bsp129	Bacillus simplex	99.9	<.0001	<.0001	1	<.0001
371	Bsp130	Bacillus simplex	61.6	0.049	0.0109	0.096	<.0001
372	Bsp131	Bacillus simplex	1.1	0.9199	1	<.0001	1
373	Bsp132	Bacillus simplex	9	1	1	<.0001	1
374	Bsp133	Bacillus simplex	73.7	0.0007	<.0001	0.8329	<.0001
375	Bsp134	Bacillus simplex	13.6	1	1	<.0001	1
376	Bsp135	Bacillus simplex	10.1	1	1	<.0001	1
377	Bsp136	Bacillus simplex	10.9	1	1	<.0001	1
378	Bsp137	Bacillus simplex	7.1	1	1	<.0001	1
379	Bsp138	Bacillus simplex	0	0.8384	0.9999	<.0001	1
380	Bsp139	Bacillus simplex	67.6	0.0072	0.0011	0.3548	<.0001
381	Bsp140	Bacillus simplex	4.6	0.9998	1	<.0001	1
382	Bsp141	Bacillus simplex	99.9	<.0001	<.0001	1	<.0001
383	Bsp142	Bacillus simplex	6	1	1	<.0001	1
384	Bsp143	Bacillus simplex	3.8	1	1	<.0001	1
385	Bsp144	Bacillus simplex	10.8	1	1	<.0001	1
386	Bsp145	Bacillus simplex	0	0.8384	0.9999	<.0001	1
387	Bsp146	Bacillus simplex	70.9	0.0021	0.0003	0.6075	<.0001
388	Bsp147	Bacillus simplex	6.1	1	1	<.0001	1
389	Bsp148	Bacillus simplex	17.6	1	1	<.0001	1
390	Bsp149	Bacillus simplex	64.7	0.0189	0.0035	0.2013	<.0001
391	Bsp150	Bacillus simplex	2.1	0.9705	1	<.0001	1
392	Bsp151	Bacillus simplex	2.8	0.9889	1	<.0001	1
393	Bsp152	Bacillus simplex	14.7	1	1	<.0001	1
394	Bsp153	Bacillus simplex	89.7	<.0001	<.0001	1	<.0001
395	Bsp154	Bacillus simplex	48.2	0.7383	0.3598	0.0011	0.0106
396	Bsp155	Bacillus simplex	4.8	0.9999	1	<.0001	1
397	Bsp156	Bacillus simplex	3.4	0.9961	1	<.0001	1
398	Bsp157	Bacillus simplex	16.6	1	1	<.0001	1
399	Bsp158	Bacillus simplex	30.8	1	1	<.0001	0.2245
400	Bsp159	Bacillus simplex	56.8	0.165	0.048	0.0251	0.0004
401	Bsp160	Bacillus simplex	9.6	1	1	<.0001	1
402	Bsp161	Bacillus simplex	4	0.9989	1	<.0001	1
403	Bsp162	Bacillus simplex	7.1	1	1	<.0001	1
404	Bsp163	Bacillus simplex	0	0.8384	0.9999	<.0001	1
405	Bsp164	Bacillus simplex	0	0.8384	0.9999	<.0001	1
406	Bsp165	Bacillus simplex	71.4	<.0001	<.0001	0.2188	<.0001
407	Bsp166	Bacillus simplex	1.8	0.9589	1	<.0001	1
408	Bsp167	Bacillus simplex	1.3	0.9365	1	<.0001	1
409	Bsp168	Bacillus simplex	69.1	0.0042	0.0006	0.4596	<.0001
410	Bsp169	Bacillus simplex	2.6	0.9851	1	<.0001	1
411	Bsp170	Bacillus simplex	3.1	0.9926	1	<.0001	1
412	Bsp171	Bacillus simplex	67.3	0.0079	0.0013	0.339	<.0001
413	Bsp172	Bacillus simplex	0	0.8384	0.9999	<.0001	1
414	Bsp173	Bacillus simplex	4.9	0.9999	1	<.0001	1
415	Bsp174	Bacillus simplex	5.3	1	1	<.0001	1
416	Bsp175	Bacillus simplex	6.1	1	1	<.0001	1
417	Bsp176	Bacillus simplex	34.7	1	0.9866	<.0001	0.073
418	Bsp177	Bacillus simplex	1.4	0.9379	1	<.0001	1
419	Bsp178	Bacillus simplex	1.7	0.9567	1	<.0001	1
420	Bsp179	Bacillus simplex	3.6	0.9975	1	<.0001	1
421	Bsp180	Bacillus simplex	7.3	1	1	<.0001	1
422	Bsp181	Bacillus simplex	5.9	1	1	<.0001	1
423	Bsp182	Bacillus simplex	1.6	0.9521	1	<.0001	1
424	Bsp183	Bacillus simplex	3.3	0.9948	1	<.0001	1
425	Bsp184	Bacillus simplex	4.8	0.9999	1	<.0001	1
426	Bsp185	Bacillus simplex	9.5	1	1	<.0001	1
427	Bsp186	Bacillus simplex	8.3	1	1	<.0001	1
428	Bsp187	Bacillus simplex	35.6	1	0.9589	<.0001	0.054
429	Bsp188	Bacillus simplex	73	0.0009	0.0001	0.7829	<.0001
430	Bsp189	Bacillus simplex	7.3	1	1	<.0001	1
431	Bsp190	Bacillus simplex	2.2	0.9754	1	<.0001	1
432	Bsp191	Bacillus simplex	2.5	0.9822	1	<.0001	1
433	Bsp192	Bacillus simplex	15.1	1	1	<.0001	1
434	Bsp193	Bacillus simplex	4.6	0.9998	1	<.0001	1
435	Bsp194	Bacillus simplex	7.8	1	1	<.0001	1
436	Bsp195	Bacillus simplex	32.1	1	1	<.0001	0.1594
437	Bsp196	Bacillus simplex	95.1	<.0001	<.0001	1	<.0001
438	Bsp197	Bacillus simplex	38.2	0.9987	0.7524	<.0001	0.0203
439	Bsp198	Bacillus simplex	48.4	0.2692	0.0672	<.0001	0.0002
440	Bsp199	Bacillus simplex	41	0.9246	0.4705	<.0001	0.0063
441	Bsp200	Bacillus simplex	30.9	1	1	<.0001	0.2174
442	Bsp201	Bacillus simplex	1.7	0.9567	1	<.0001	1
443	Bsp202	Bacillus simplex	14.7	1	1	<.0001	1
444	Bsp203	Bacillus simplex	13.2	1	1	<.0001	1
445	Bsp204	Bacillus simplex	21.1	1	1	<.0001	0.9164
446	Bsp205	Bacillus simplex	5.5	1	1	<.0001	1
447	Bsp206	Bacillus simplex	0	0.8384	0.9999	<.0001	1
448	Bsp207	Bacillus simplex	2.2	0.9738	1	<.0001	1
449	Bsp208	Bacillus simplex	27.5	1	1	<.0001	0.4728
450	Bssin1	Bacillus subtilis subsp. inaquosorum	0	0.8384	0.9999	<.0001	1
451	Bssin2	Bacillus subtilis subsp. inaquosorum	1	0.9166	1	<.0001	1
452	Bssin3	Bacillus subtilis subsp. inaquosorum	7.5	1	1	<.0001	1
453	Bssin4	Bacillus subtilis subsp. inaquosorum	6.8	1	1	<.0001	1
454	Bssin5	Bacillus subtilis subsp. inaquosorum	14.4	1	1	<.0001	1
455	Bssin6	Bacillus subtilis subsp. inaquosorum	25.6	1	1	<.0001	0.6625
456	Bssin7	Bacillus subtilis subsp. inaquosorum	2.4	0.981	1	<.0001	1
457	Bssin8	Bacillus subtilis subsp. inaquosorum	4.6	0.9998	1	<.0001	1
458	Bssin9	Bacillus subtilis subsp. inaquosorum	4.8	0.9999	1	<.0001	1
459	Bssin10	Bacillus subtilis subsp. inaquosorum	6.1	1	1	<.0001	1
460	Bssin11	Bacillus subtilis subsp. inaquosorum	0	0.8384	0.9999	<.0001	1
461	Bssin12	Bacillus subtilis subsp. inaquosorum	0	0.8384	0.9999	<.0001	1
462	Bssin13	Bacillus subtilis subsp. inaquosorum	1.4	0.9379	1	<.0001	1
463	Bssin14	Bacillus subtilis subsp. inaquosorum	1.7	0.9533	1	<.0001	1
464	Bssin15	Bacillus subtilis subsp. inaquosorum	0.5	0.8805	1	<.0001	1
465	Bsssu1	Bacillus subtilis subsp. subtilis	0	0.8384	0.9999	<.0001	1
466	Bsssu2	Bacillus subtilis subsp. subtilis	74.8	0.0004	<.0001	0.9084	<.0001
467	Bsssu3	Bacillus subtilis subsp. subtilis	74.2	0.0005	<.0001	0.8715	<.0001
468	Bsssu4	Bacillus subtilis subsp. subtilis	0.7	0.892	1	<.0001	1
469	Bte1	Bacillus tequilensis	29.6	1	1	<.0001	0.3035
470	Bte2	Bacillus tequilensis	23.7	1	1	<.0001	0.8537
471	Bte3	Bacillus tequilensis	0	0.8384	0.9999	<.0001	1
472	Bth1	Bacillus thuringiensis	0	0.8384	0.9999	<.0001	1
473	Bth2	Bacillus thuringiensis	2.6	0.9845	1	<.0001	1
474	Bth3	Bacillus thuringiensis	2.8	0.9889	1	<.0001	1
475	Bth4	Bacillus thuringiensis	1.6	0.9497	1	<.0001	1
476	Bto1	Bacillus toyonensis	3.2	0.9943	1	<.0001	1
477	Bto2	Bacillus toyonensis	14.2	1	1	<.0001	1
478	Bto3	Bacillus toyonensis	3.1	0.9926	1	<.0001	1
479	Bto4	Bacillus toyonensis	11	1	1	<.0001	1
480	Bto5	Bacillus toyonensis	0	0.8384	0.9999	<.0001	1
481	Bto6	Bacillus toyonensis	5.2	1	1	<.0001	1
482	Bto7	Bacillus toyonensis	13.2	1	1	<.0001	1
483	Bto8	Bacillus toyonensis	7.8	1	1	<.0001	1
484	Bto9	Bacillus toyonensis	5.7	1	1	<.0001	1
485	Bto10	Bacillus toyonensis	64.7	0.0005	<.0001	0.025	<.0001
486	Bto11	Bacillus toyonensis	62.7	0.0013	0.0001	0.0114	<.0001
487	Bto12	Bacillus toyonensis	1.9	0.965	1	<.0001	1
488	Bto13	Bacillus toyonensis	21	1	1	<.0001	0.9905
489	Bto14	Bacillus toyonensis	0	0.8384	0.9999	<.0001	1
490	Bto15	Bacillus toyonensis	0	0.8384	0.9999	<.0001	1
491	Bto16	Bacillus toyonensis	13.5	1	1	<.0001	1
492	Bto17	Bacillus toyonensis	0.7	0.8939	1	<.0001	1
493	Bto18	Bacillus toyonensis	5.5	1	1	<.0001	1
494	Bto19	Bacillus toyonensis	0	0.8384	0.9999	<.0001	1
495	Bto20	Bacillus toyonensis	5.9	1	1	<.0001	1
496	Bto21	Bacillus toyonensis	11.5	1	1	<.0001	1
497	Bto22	Bacillus toyonensis	64.8	0.0004	<.0001	0.0265	<.0001
498	Bto23	Bacillus toyonensis	51.1	0.1304	0.0258	<.0001	<.0001
499	Bto24	Bacillus toyonensis	8.7	1	1	<.0001	1
500	Bto25	Bacillus toyonensis	18.2	1	1	<.0001	1
501	Bto26	Bacillus toyonensis	0	0.8384	0.9999	<.0001	1
502	Bto27	Bacillus toyonensis	0	0.8384	0.9999	<.0001	1
503	Bto28	Bacillus toyonensis	6	1	1	<.0001	1
504	Bto29	Bacillus toyonensis	17.3	1	1	<.0001	1
505	Bto30	Bacillus toyonensis	36.9	1	0.8765	<.0001	0.0338
506	Bto31	Bacillus toyonensis	3.8	0.9982	1	<.0001	1
507	Bto32	Bacillus toyonensis	10.3	1	1	<.0001	1
508	Bto33	Bacillus toyonensis	0.3	0.8664	1	<.0001	1
509	Bto34	Bacillus toyonensis	0	0.8384	0.9999	<.0001	1
510	Bto35	Bacillus toyonensis	0	0.8384	0.9999	<.0001	1
511	Bto36	Bacillus toyonensis	1.1	0.9246	1	<.0001	1
512	Bto37	Bacillus toyonensis	0.5	0.8785	1	<.0001	1
513	Bto38	Bacillus toyonensis	31.7	1	1	<.0001	0.1792
514	Bto39	Bacillus toyonensis	0.8	0.9047	1	<.0001	1
515	Bto40	Bacillus toyonensis	1	0.9133	1	<.0001	1
516	Bto41	Bacillus toyonensis	1.6	0.9484	1	<.0001	1
517	Bto42	Bacillus toyonensis	0	0.8384	0.9999	<.0001	1
518	Bto43	Bacillus toyonensis	1.6	0.9509	1	<.0001	1
519	Bto44	Bacillus toyonensis	0	0.8384	0.9999	<.0001	1
520	Bto45	Bacillus toyonensis	11.9	1	1	<.0001	1
521	Bto46	Bacillus toyonensis	0.6	0.8882	1	<.0001	1
522	Bto47	Bacillus toyonensis	0.9	0.9099	1	<.0001	1
523	Bto48	Bacillus toyonensis	0.6	0.8901	1	<.0001	1
524	Bto49	Bacillus toyonensis	0.4	0.8725	1	<.0001	1
525	Bto50	Bacillus toyonensis	1.8	0.9599	1	<.0001	1
526	Bto51	Bacillus toyonensis	67.6	<.0001	<.0001	0.0718	<.0001
527	Bto52	Bacillus toyonensis	1.9	0.962	1	<.0001	1
528	Bto53	Bacillus toyonensis	20.3	1	1	<.0001	0.9971
529	Bto54	Bacillus toyonensis	33.1	1	0.9994	<.0001	0.1185
530	Bto55	Bacillus toyonensis	42.2	0.8384	0.3722	<.0001	0.0038
531	Bto56	Bacillus toyonensis	0	0.8384	0.9999	<.0001	1
532	Bto57	Bacillus toyonensis	34.2	1	0.9932	<.0001	0.0837
533	Bto58	Bacillus toyonensis	1.1	0.9215	1	<.0001	1
534	Bto59	Bacillus toyonensis	1.7	0.9567	1	<.0001	1
535	Bto60	Bacillus toyonensis	0.9	0.9116	1	<.0001	1
536	Bto61	Bacillus toyonensis	0	0.8384	0.9999	<.0001	1
537	Bto62	Bacillus toyonensis	1.7	0.9544	1	<.0001	1
538	Bto63	Bacillus toyonensis	0.4	0.8745	1	<.0001	1
539	Bto64	Bacillus toyonensis	5.1	1	1	<.0001	1
540	Bto65	Bacillus toyonensis	1	0.9133	1	<.0001	1
541	Bto66	Bacillus toyonensis	0.8	0.9012	1	<.0001	1
542	Bto67	Bacillus toyonensis	3.5	0.9969	1	<.0001	1
543	Bto68	Bacillus toyonensis	0	0.8384	0.9999	<.0001	1
544	Bto69	Bacillus toyonensis	19.3	1	1	<.0001	0.9998
545	Bto70	Bacillus toyonensis	0.9	0.9116	1	<.0001	1
546	Bve1	Bacillus velezensis	0	0.8384	0.9999	<.0001	1
547	Bve2	Bacillus velezensis	54.7	0.2613	0.0861	0.0125	0.0009
548	Bve3	Bacillus velezensis	11.4	1	1	<.0001	1
549	Bve4	Bacillus velezensis	32.1	1	1	<.0001	0.1572
550	Bve5	Bacillus velezensis	10.2	1	1	<.0001	1
551	Bve6	Bacillus velezensis	7.1	1	1	<.0001	1
552	Bve7	Bacillus velezensis	7.9	1	1	<.0001	1
553	Bve8	Bacillus velezensis	17.7	1	1	<.0001	1
554	Bve9	Bacillus velezensis	15	1	1	<.0001	1
555	Bve10	Bacillus velezensis	11.8	1	1	<.0001	1
556	Bve11	Bacillus velezensis	0	0.8384	0.9999	<.0001	1
557	Bve12	Bacillus velezensis	46.4	0.8749	0.4883	0.0005	0.0192
558	Bve13	Bacillus velezensis	39.8	1	0.9616	<.0001	0.1216
559	Bve14	Bacillus velezensis	15.3	1	1	<.0001	1
560	Bve15	Bacillus velezensis	20.7	1	1	<.0001	1
561	Bve16	Bacillus velezensis	23.8	1	1	<.0001	0.8472
562	Bve17	Bacillus velezensis	17	1	1	<.0001	1
563	Bve18	Bacillus velezensis	0	0.8384	0.9999	<.0001	1
564	Bve19	Bacillus velezensis	0	0.8384	0.9999	<.0001	1
565	Bve20	Bacillus velezensis	0	0.8384	0.9999	<.0001	1
566	Bve21	Bacillus velezensis	9.4	1	1	<.0001	1
567	Bve22	Bacillus velezensis	0	0.8384	0.9999	<.0001	1
568	Bve23	Bacillus velezensis	0	0.8384	0.9999	<.0001	1
569	Bve24	Bacillus velezensis	1.9	0.965	1	<.0001	1
570	Bve25	Bacillus velezensis	1.1	0.9231	1	<.0001	1
571	Bve26	Bacillus velezensis	4.9	0.9999	1	<.0001	1
572	Bve27	Bacillus velezensis	2.3	0.9769	1	<.0001	1
573	Bve28	Bacillus velezensis	2.7	0.9866	1	<.0001	1
574	Bve29	Bacillus velezensis	3.8	0.9982	1	<.0001	1
575	Bve30	Bacillus velezensis	0.9	0.9082	1	<.0001	1
576	Bve31	Bacillus velezensis	33.9	1	0.9961	<.0001	0.092
577	Bve32	Bacillus velezensis	1.1	0.9215	1	<.0001	1
578	Bve33	Bacillus velezensis	15.1	1	1	<.0001	1
579	Bve34	Bacillus velezensis	6.7	1	1	<.0001	1
580	Bve35	Bacillus velezensis	4.8	0.9999	1	<.0001	1
581	Bve36	Bacillus velezensis	13.6	1	1	<.0001	1
582	Bve37	Bacillus velezensis	39.2	1	0.9795	<.0001	0.142
583	Bve38	Bacillus velezensis	2.7	0.9876	1	<.0001	1
584	Bve39	Bacillus velezensis	3.3	0.9955	1	<.0001	1
585	Bve40	Bacillus velezensis	12.5	1	1	<.0001	1
586	Bve41	Bacillus velezensis	3.8	0.9982	1	<.0001	1
587	Bwe1	Bacillus weihenstephanensis	8	1	1	<.0001	1
588	Bwe2	Bacillus weihenstephanensis	21.1	1	1	<.0001	0.9889
589	Bwe3	Bacillus weihenstephanensis	31.5	1	1	<.0001	0.1892
590	Bwe4	Bacillus weihenstephanensis	47	0.3722	0.105	<.0001	0.0003
591	Bwe5	Bacillus weihenstephanensis	1.2	0.9277	1	<.0001	1
592	Bwe6	Bacillus weihenstephanensis	93.3	<.0001	<.0001	1	<.0001
593	Bwe7	Bacillus weihenstephanensis	0.7	0.8975	1	<.0001	1
594	Bwe8	Bacillus weihenstephanensis	3.4	0.9957	1	<.0001	1
595	Bwe9	Bacillus weihenstephanensis	6.7	1	1	<.0001	1
596	Bwe10	Bacillus weihenstephanensis	1.1	0.9199	1	<.0001	1
597	Bwe11	Bacillus weihenstephanensis	0.6	0.8901	1	<.0001	1
598	Bwe12	Bacillus weihenstephanensis	11.1	1	1	<.0001	1
599	Bwe13	Bacillus weihenstephanensis	1.1	0.9231	1	<.0001	1
600	Bwe14	Bacillus weihenstephanensis	0	0.8384	0.9999	<.0001	1
601	Bwe15	Bacillus weihenstephanensis	14.3	1	1	<.0001	1
602	Bwe16	Bacillus weihenstephanensis	17.9	1	1	<.0001	1
603	Bwe17	Bacillus weihenstephanensis	29.9	1	1	<.0001	0.2792
604	Bwe18	Bacillus weihenstephanensis	39.1	0.9932	0.6676	<.0001	0.0146
605	Bwe19	Bacillus weihenstephanensis	1.3	0.9336	1	<.0001	1
606	Bwe20	Bacillus weihenstephanensis	1.1	0.9246	1	<.0001	1
607	Bwe21	Bacillus weihenstephanensis	0.6	0.8901	1	<.0001	1
608	Enx1	Enterobacter xiangfangensis	0	0.8384	0.9999	<.0001	1
609	Exs1	Exiguobacterium sibiricum	28.7	1	1	<.0001	0.3702
610	Fso1	Fictibacillus solisalsi	59.6	0.0834	0.0206	0.0572	0.0001
611	Lma1	Lysinibacillus macroides	13.1	1	1	<.0001	1
612	Lpa1	Lysinibacillus parviboronicapiens	20.6	1	1	<.0001	0.9946
613	Paam1	Paenibacillus amylolyticus	16.5	1	1	<.0001	1
614	Paam2	Paenibacillus amylolyticus	26.5	1	1	<.0001	0.5751
615	Paam3	Paenibacillus amylolyticus	22.1	1	1	<.0001	0.9589
616	Paam4	Paenibacillus amylolyticus	11	1	1	<.0001	1
617	Paam5	Paenibacillus amylolyticus	11.6	1	1	<.0001	1
618	Paam6	Paenibacillus amylolyticus	4.1	0.9992	1	<.0001	1
619	Paam7	Paenibacillus amylolyticus	4.4	0.9996	1	<.0001	1
620	Paam8	Paenibacillus amylolyticus	3.4	0.9961	1	<.0001	1
621	Paam9	Paenibacillus amylolyticus	9.6	1	1	<.0001	1
622	Paba1	Paenibacillus barcinonensis	17.4	1	1	<.0001	1
623	Pagl1	Paenibacillus glycanilyticus	7.5	1	1	<.0001	1
624	Pail1	Paenibacillus illinoisensis	16.8	1	1	<.0001	1
625	Pala1	Paenibacillus lautus	0	0.8384	0.9999	<.0001	1
626	Pala2	Paenibacillus lautus	15.3	1	1	<.0001	1
627	Pala3	Paenibacillus lautus	7.3	1	1	<.0001	1
628	Pala4	Paenibacillus lautus	10.1	1	1	<.0001	1
629	Pamd1	Paenibacillus macquariensis subsp. defensor	12.2	1	1	<.0001	1
630	Panag1	Pantoea agglomerans	0	0.8384	0.9999	<.0001	1
631	Paod1	Paenibacillus odorifer	25.7	1	1	<.0001	0.6573
632	Pata1	Paenibacillus taichungensis	64.4	0.0211	0.004	0.1865	<.0001
633	Path1	Paenibacillus thiaminolyticus	1.7	0.9544	1	<.0001	1
634	Patu1	Paenibacillus tundrae	11.7	1	1	<.0001	1
635	Pava1	Paenibacillus validus	13.7	1	1	<.0001	1
636	Paxy1	Paenibacillus xylanexedens	74.8	<.0001	<.0001	0.4681	<.0001
637	Paxy2	Paenibacillus xylanexedens	22.5	1	1	<.0001	0.9379
638	Rhil1	Rhizobium larrymoorei	0.7	0.8975	1	<.0001	1
639	Rhoq1	Rhodococcus qingshengii	0	0.8384	0.9999	<.0001	1
640	Soi1	Solibacillus isronensis	8.9	1	1	<.0001	1
641	Spg1	Sporosarcina globispora	22.2	1	1	<.0001	0.9533
642	Spg2	Sporosarcina globispora	1.1	0.9246	1	<.0001	1
643	Spg3	Sporosarcina globispora	6.1	1	1	<.0001	1
644	Spg4	Sporosarcina globispora	20.2	1	1	<.0001	0.9978
645	Spg5	Sporosarcina globispora	45.5	0.5083	0.1639	<.0001	0.0008
646	Spg6	Sporosarcina globispora	18.5	1	1	<.0001	1
647	Spg7	Sporosarcina globispora	2.6	0.9845	1	<.0001	1
648	Spg8	Sporosarcina globispora	6	1	1	<.0001	1
649	Spg9	Sporosarcina globispora	26	1	1	<.0001	0.6211
650	Spg10	Sporosarcina globispora	0	0.8384	0.9999	<.0001	1
651	Uid1	Bacillus aerophilus/stratosphaericus*	31.7	1	1	<.0001	0.5868
652	Uid2	Bacillus stratosphericus/aerophilus*	11.4	1	1	<.0001	1
653	Uid3	Bacillus stratosphericus/aerophilus*	0	0.8384	0.9999	<.0001	1
654	Uid4	Bacillus stratosphericus/aerophilus*	6.6	1	1	<.0001	1
655	Uid5	Bacillus stratosphericus/aerophilus*	10.2	1	1	<.0001	1
656	Uid6	Bacillus stratosphericus/aerophilus*	24.4	1	1	<.0001	0.7846
657	Uid7	Bacillus stratosphericus/aerophilus*	47.4	0.3386	0.092	<.0001	0.0003
658	Uid8	Bacillus altitudinis/stratosphericus/aerophilus*	0	0.8384	0.9999	<.0001	1
659	Uid9	Bacillus altitudinis/stratosphericus/aerophilus*	5.1	1	1	<.0001	1
660	Uid10	Bacillus altitudinis/stratosphericus/aerophilus*	1.3	0.9336	1	<.0001	1
661	Uid11	Unidentified species*	8.2	1	1	<.0001	1
662	Uid12	Unidentified species*	21.8	1	1	<.0001	0.9697
663	Uid13	Unidentified species*	1.9	0.965	1	<.0001	1
	Control	Active ingredientc
	Poncho/Votivo	Clothianidin and B. firmus I-1582	21.1	…	1	<.0001	0.9885
	Clariva	Pasteuria nishizawae	16.3	1	…	<.0001	0
	Temik	Aldicarb	99.6	<.0001	<.0001	…	<.0001
	Untreated control	Sterile distilled water	2.8	0.9885	1	<.0001	…
	aIn vitro tests were performed in 96-well plates. Data collected were analyzed in SAS 9.4 using PROC GLIMMIX procedure at significant level of α ≤ 0.05.
	P value less than 0.05 indicate a significant effect. Adjusted P values were obtained according to Dunnett's method. The LS-means are presented in the tables with adjusted P values to determine statistical differences.
	bMortality was determined by calculating as the following equation: [(live J2 prior to exposure - live J2 at 48 hours) / live J2 prior to exposure] × 100.
	cActive ingredients for the nematicides Poncho/Votivo are Clothianidin plus B. firmus I-1582, Clariva is Pasteuria nishizawae, Temik is Aldicarb,
	and untreated control is sterile distilled water.
	dDunnett's option was used in the LSMEANS statement to assess the differences between bacterial isolates and the Poncho/Votivo, Clariva, Temik,
	and the untreted control. Adjusted P values are presented.
	*Indistinguishable species and unidentified strains.
